# Supplementary material
Source: PubMed Central journal article supplement (PMC5811195)
Supplement: NIHMS924917-supplement-BFaa869fsuppdata_pdf.pdf [file NIHMS924917-supplement-BFaa869fsuppdata_pdf.pdf]

## SUPPORTING INFORMATION

### Quantitative criteria to benchmark new and existing bio-inks for cell compatibility

Dubbin K\*, Tabet A\*, Heilshorn SC#

\*denotes co-first authorship

# corresponding author

heilshorn@stanford.edu  
Department of Materials Science and Engineering  
Stanford University  
476 Lomita Mall  
Stanford, CA 94305

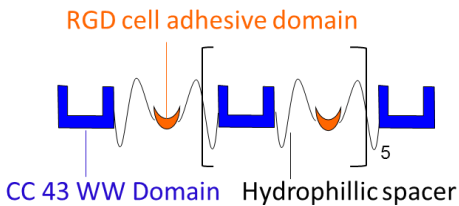

MGSSHHHHHSSGLVPRGSSSGHIDDDDKVDGT[**RLPAGWEQRMD**  
**VKGRPYFVDHVTKSTTWEDPREPR**]GTLDEL[AGAGAGPEG]<sub>2</sub>**RGDS**  
AGPEG[AGAGAGPEG]<sub>2</sub>ELLDGT([**RLPAGWEQRMDVKGRPYFVDHV**  
**TKSTTWEDPREPR**]GTLDEL[AGAGAGPEG]<sub>2</sub>**RGDS**AGPEG[AGAGAG  
PEG]<sub>2</sub>ELLDGT)<sub>5</sub>[**RLPAGWEQRMDVKGRPYFVDHVTKSTTWEDPRE**  
**PE**]GTLE

**Figure S1:** Schematic (left) and amino acid sequence (right) of C7 component of RAPID ink. The cell-adhesive RGDS peptide is labeled in orange, the CC43 WW domain is labeled in blue, and the hydrophilic spacer is labeled in black. The CC43 WW domain sequence was first reported in Russ, et al. [50].

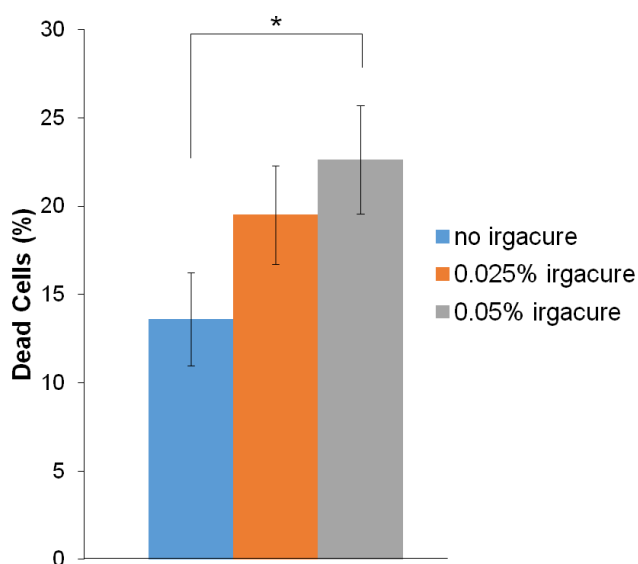

**Figure S2:** Quantified cell death of 3T3 cells encapsulated in PEDGA bio-ink with xanthan gum thickening agent (PEGDA + XG) after exposure to either Irgacure 2959 or no Irgacure for 1 hour without light exposure.

| Sample     | Peptides/chain |
|------------|----------------|
| RAPID-high | 37             |
| RAPID-med  | 14             |
| RAPID-P2   | 9              |

**Table S1: Peptide conjugation to RAPID component 2.** Average number of P1 (RAPID-high and RAPID-med) or P2 (RAPID-P2) peptides covalently tethered to alginate, as determined by BCA assay.

| Material    | 60 $\mu\text{L}/\text{min}$ | 75 $\mu\text{L}/\text{min}$ |
|-------------|-----------------------------|-----------------------------|
| PEGDA + XG  | 3.5                         | 5.0                         |
| PEGDA + Alg | 3.5                         | 6.5                         |
| GELMA       | 10.0                        | 12.0                        |
| RAPID-high  | 2.5                         | 5.0                         |
| RAPID-med   | 2.5                         | 5.0                         |
| RAPID-P2    | 2.5                         | 5.0                         |

**Table S2:** Printing pressures (PSI) required to maintain an average bio-ink flow rate of 75 or 60  $\mu\text{L}/\text{min}$ .

| Material            | Viscosity ( $\text{Pa}\cdot\text{s}$ ) |
|---------------------|----------------------------------------|
| PEGDA               | $0.01 \pm 0.002$                       |
| PEGDA + XG at 23°C  | $2.8 \pm 0.4$                          |
| PEGDA + Alg at 23°C | $0.6 \pm 0.1$                          |
| GelMA at 37°C       | $780 \pm 120$                          |
| RAPID-high at 23°C  | $3.6 \pm 1.0$                          |
| RAPID-med at 23°C   | $2.6 \pm 0.4$                          |
| RAPID-P2 at 23°C    | $2.4 \pm 0.8$                          |

**Table S3:** Viscosity data for various bio-inks.
